# Supplementary material
Source: publisher figshare collection journal article supplement (https://tandf.figshare.com/ndownloader/files/13382138)

# **LDL cholesterol is associated with systemic vascular resistance and wave reflection in subjects naive to cardiovascular drugs**

Manoj Kumar Choudhary<sup>a</sup>, Arttu Eräranta<sup>a</sup>, Antti J. Tikkakoski<sup>a,b</sup>, Jenni Koskela<sup>a</sup>,  
Elina J. Hautaniemi<sup>a</sup>, Mika Kähönen<sup>a,b</sup>, Jukka Mustonen<sup>a,c</sup>, Ilkka Pörsti<sup>a,c</sup>

<sup>a</sup>Faculty of Medicine and Life Sciences, University of Tampere, Tampere; Finland

<sup>b</sup>Department of Clinical Physiology, Tampere University Hospital, Tampere; Finland

<sup>c</sup>Department of Internal Medicine, Tampere University Hospital, Tampere, Finland.

**Supplementary Figure 1.**

**Study flow chart of haemodynamic changes in patients with primary or secondary hypertension versus normotensive subjects**

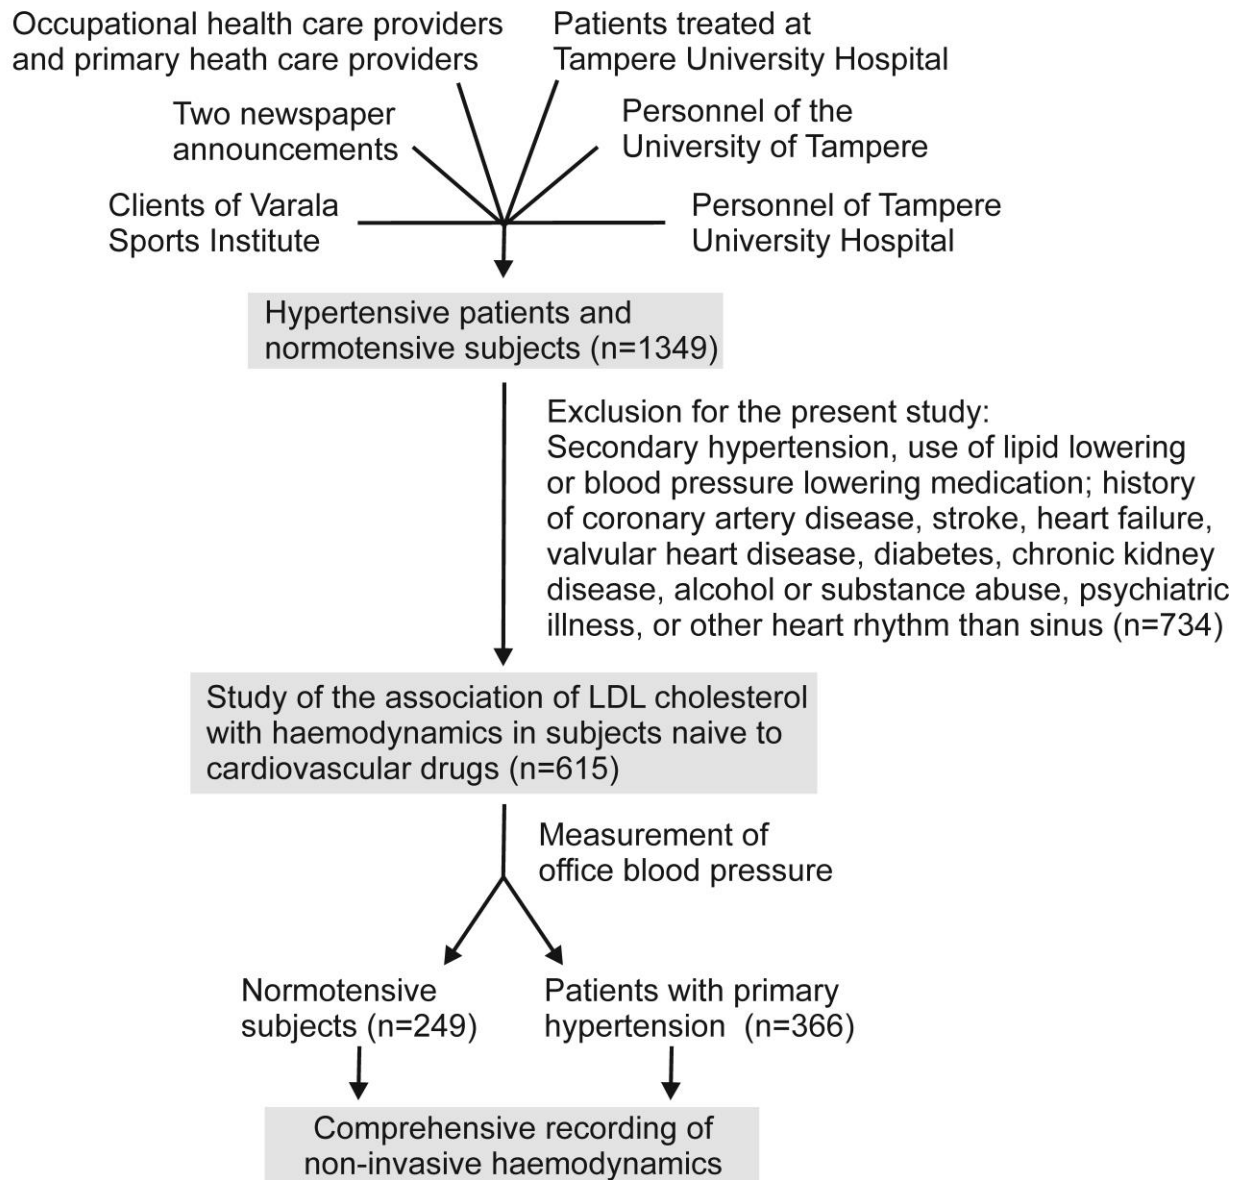

**Supplementary Figure 2.** Supine radial systolic (A), and diastolic (B) blood pressure, and augmentation index adjusted to heart rate of 75 beats per minute (C) in age- and sex-adjusted quartiles of LDL-cholesterol during 5-minute recordings. Quartiles as in Figure 1; mean $\pm$ standard error of the mean; \* $p$ <0.05, ANOVA for repeated measurements.

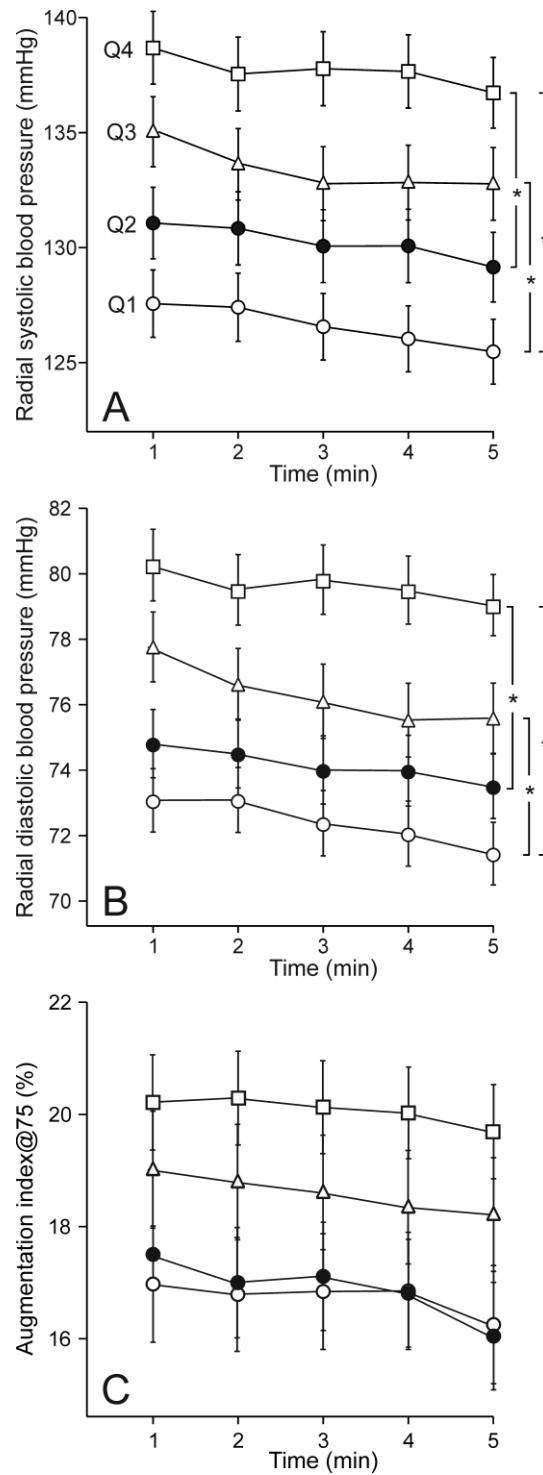

Supplement: Supplementary file 1 [file 13382138]
